# Supplementary material
Source: Springer Nature journal article supplement (https://www.springermedizin.de/resource/supplementary/12958_2008_474_MOESM1_ESM.pdf/9568138)

**A****hUtSMC**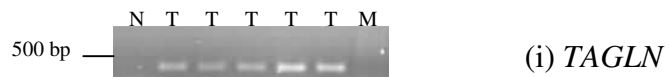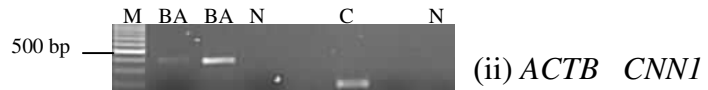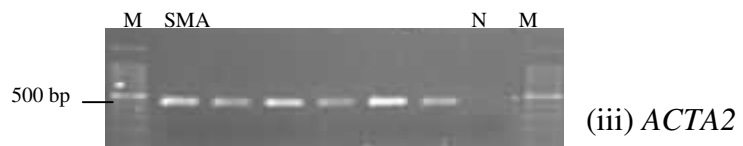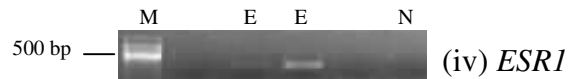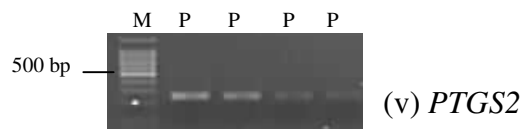**B****hTERT-HM**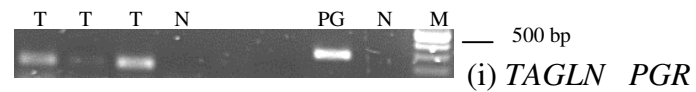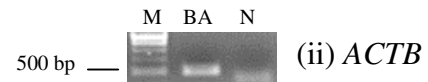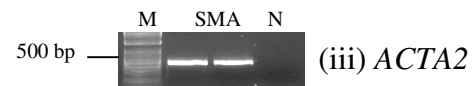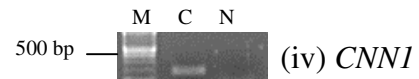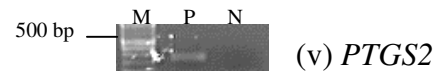**C**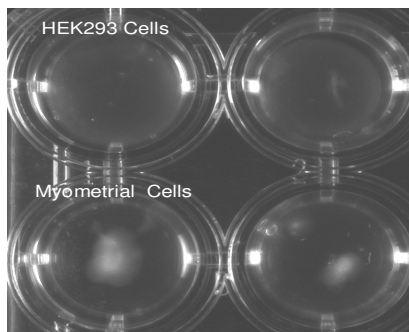

Supplement: MOESM1 [file 9568138]
